# Supplementary material for: Identification of Three Prognosis-Related Differentially Expressed lncRNAs Driven by Copy Number Variation in Thyroid Cancer
Source: Hindawi journal article supplement (doi:10.1155/2022/9203796), 2022-05-20

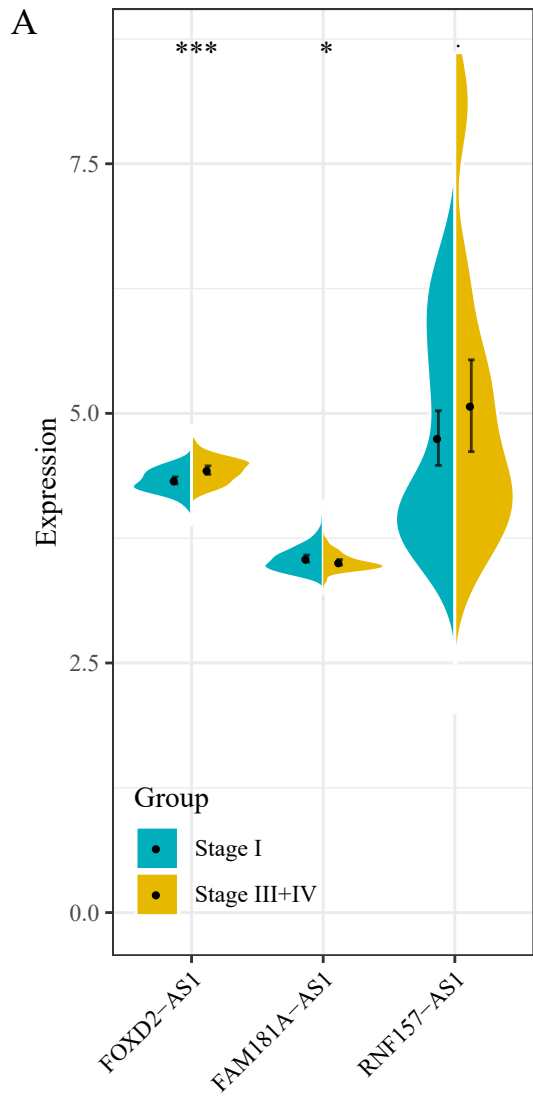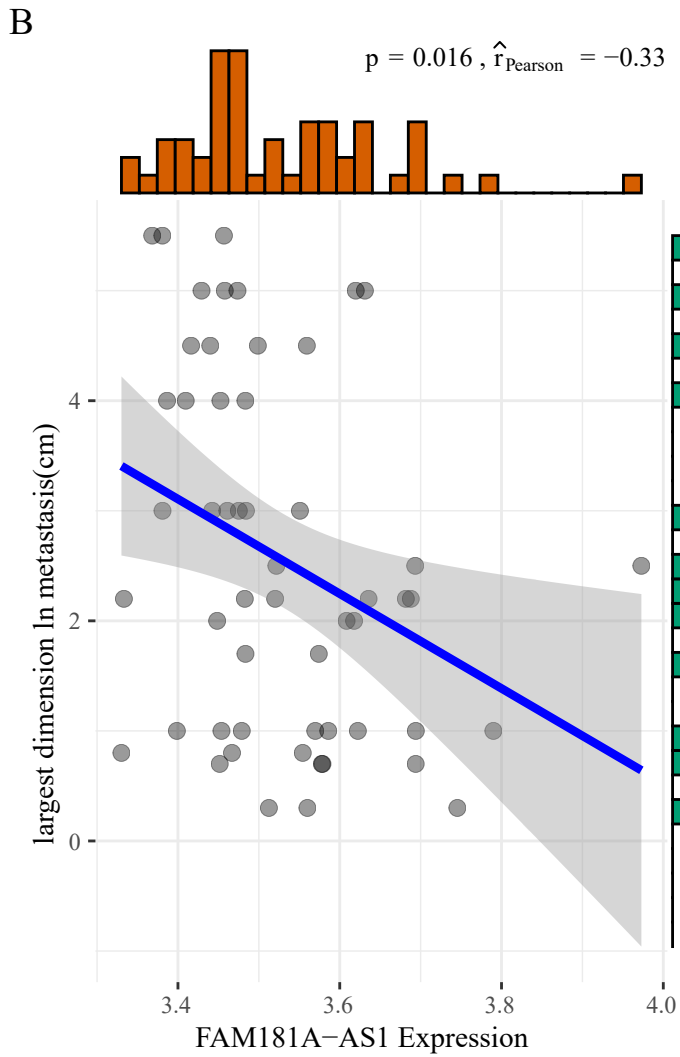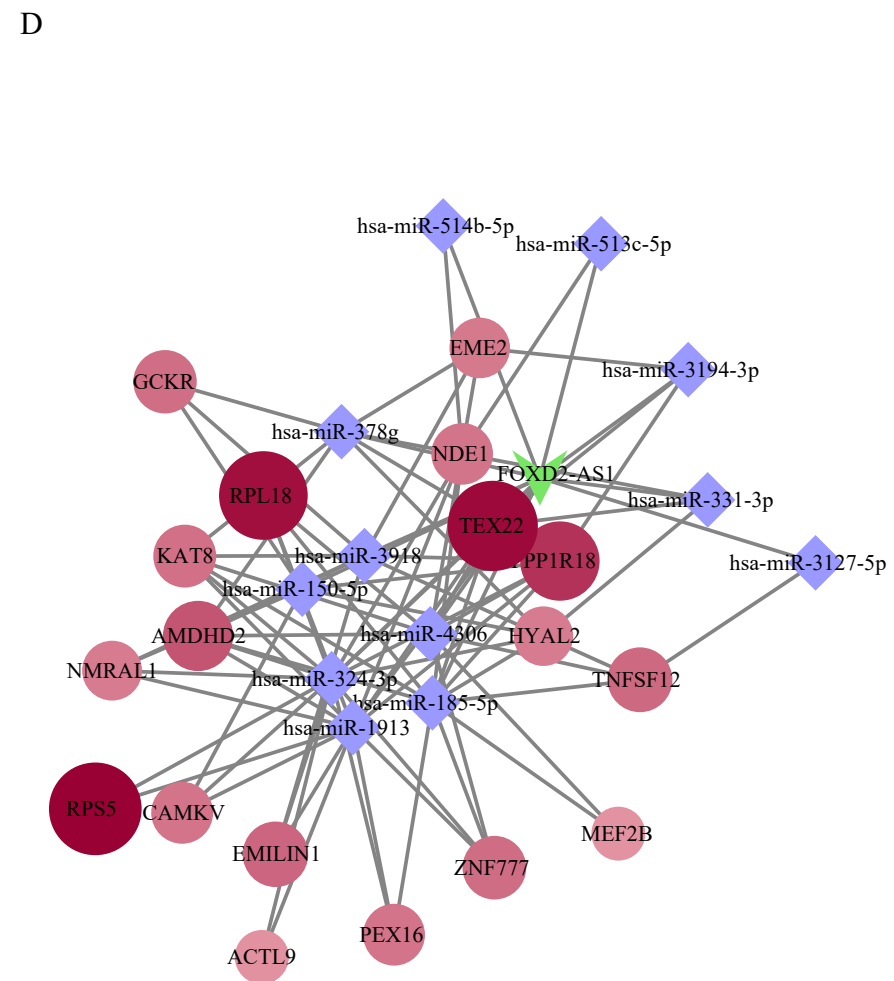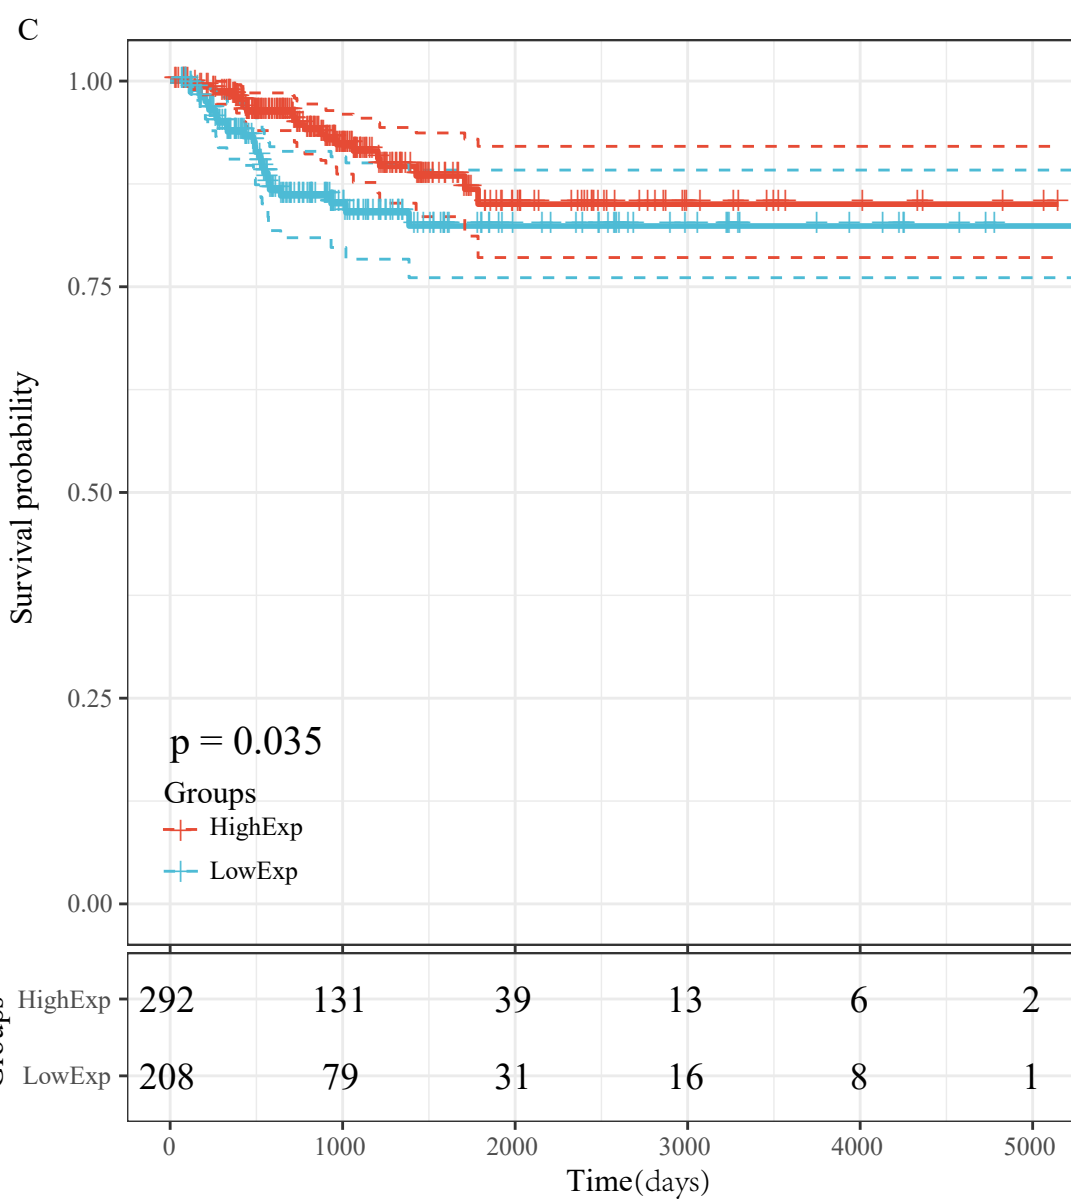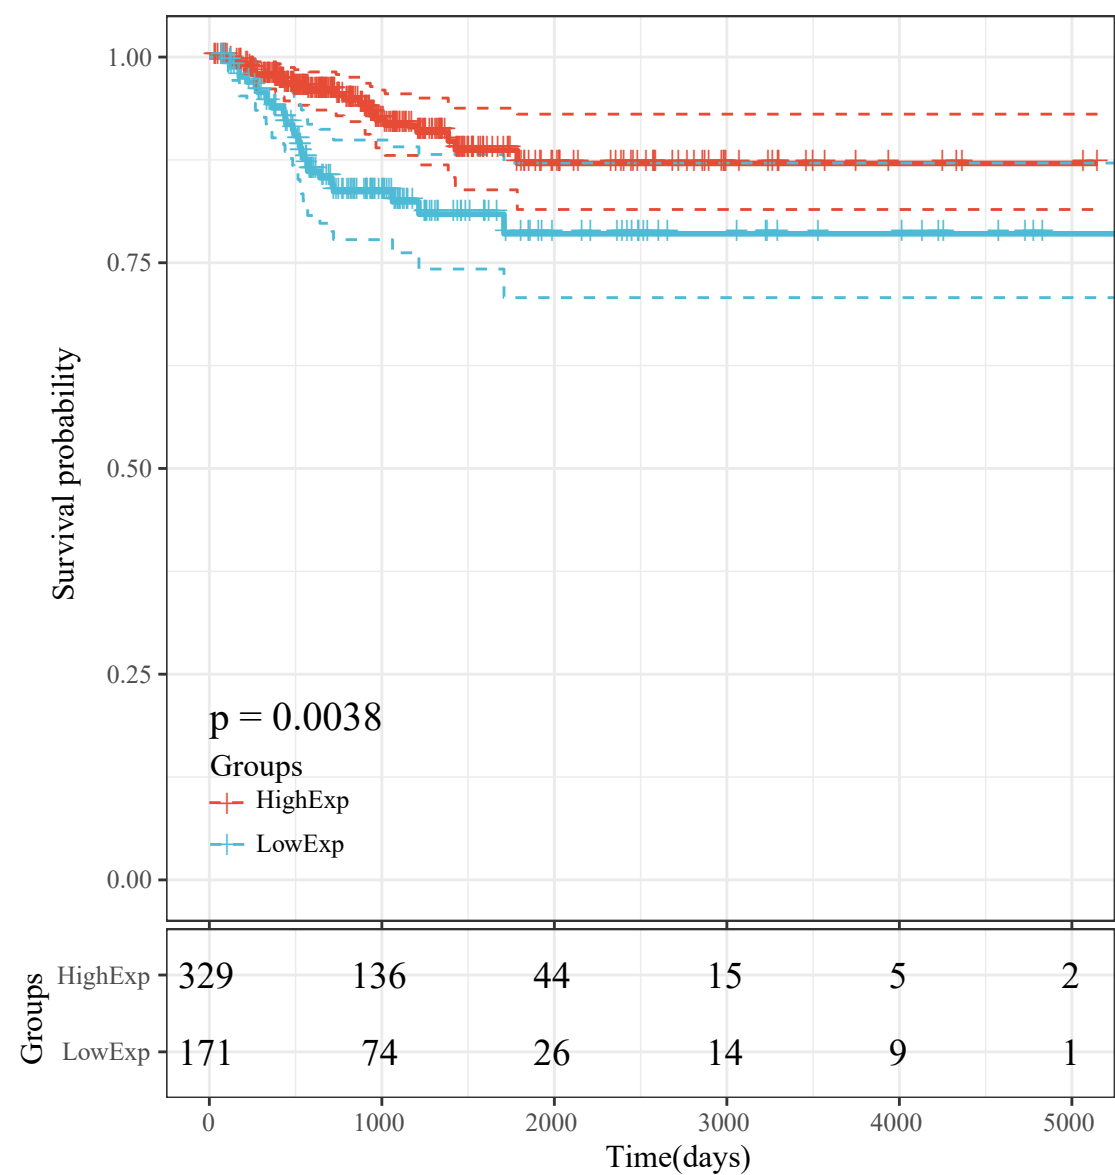

Supplement: f2 [file 9203796.f2.pdf]
